# Supplementary material for: Patterns of funerary variability, diet, and developmental stress in a Celtic population from NE Italy (3rd-1st c BC)
Source: PLoS One. 2019 Apr 17;14(4):e0214372. doi: 10.1371/journal.pone.0214372 (PMC6469778; doi:10.1371/journal.pone.0214372)
Supplement: S7 Table — a) Bonferroni-adjusted results of Fisher's tests between clusters on presence-absence of funerary variables, and b) results of post hoc Fisher's tests (only variables presenting at least one significant result are reported). = test not possible; ns = not significant. (XLS) [file pone.0214372.s012.xls]

## Sheet: S7 Table
		S7 Table
		a)	CL1 (N=41)		CL2 (N=84)				CL1 (N=41)		cl2 (N=10)		cl3 (N=12)		cl4 (N=6)		NC2 (N=56)
			n	%	n	%	p (Fisher's)		n	%	n	%	n	%	n	%	n	%	p (Fisher's)
		Rings	0	0.0	15	17.9	0.02397		0	0	4	40	0	0	0	0	11	19.64	0.006457
		Ceramics	16	39.0	51	60.7	ns		16	39.02	7	70	6	50	6	100	32	57.14	ns
		Pins	0	0.0	30	35.7	9.573e-06		0	0	0	0	0	0	0	0	30	53.57	<0.001
		Non supine	0	0.0	20	23.8	0.001804		0	0	0	0	0	0	0	0	20	35.71	<0.001
		Structures	0	0.0	24	28.6	0.0002275		0	0	0	0	12	100	0	0	12	21.43	<0.001
		Orientation: EW	0	0.0	8	9.5	ns		0	0	6	60	1	8.33	0	0	1	1.79	<0.001
		Animal offerings	0	0.0	14	16.7	0.04626		0	0	0	0	0	0	6	100	8	14.29	<0.001
		Coins	0	0.0	15	17.9	0.02397		0	0	1	10	0	0	2	33.33	12	21.43	0.02
		Knives	0	0.0	6	7.1	ns		0	0	0	0	0	0	1	16.67	5	8.93	ns
		Beads/ pendants	0	0.0	6	7.1	ns		0	0	3	30	0	0	0	0	3	5.36	ns
		b)		CL1	cl2	cl3	cl4
		Structures	cl3	<0.001	<0.001
			cl4	.		<0.001
			NC2	ns	ns	<0.001	ns
		Pins	NC2	<0.001	0.0054	0.0027	ns
		Non supine	NC2	<0.001	ns	ns	ns
		Orientation: EW	cl2	<0.001
			NC2	ns	<0.001	ns	ns
		Animal offerings	cl4	<0.001	<0.001	<0.001
			NC2	ns	ns	ns	<0.001
